# Supplementary material for: Lipophilicity-dependent ruthenium N-heterocyclic carbene complexes as potential anticancer agents
Source: Royal Society of Chemistry journal article supplement (doi:10.1039/c5dt00169b), 2015-01-01
Supplement: c5dt00169b1.pdf [file c5dt00169b1.pdf]

## **Lipophilicity-dependent ruthenium N-heterocyclic carbene complexes as potential anticancer agents†**

**Gaochao Lv, Liubin Guo, Ling Qiu\*, Hui Yang, Tengfei Wang, Hong Liu and Jianguo Lin\***

Key Laboratory of Nuclear Medicine, Ministry of Health, Jiangsu Key Laboratory of Molecular Nuclear Medicine, Jiangsu Institute of Nuclear Medicine, Wuxi 214063, China

\* *E-mail address*: [linjianguo@jsinm.org](mailto:linjianguo@jsinm.org) (J. Lin), [qiuling@jsinm.org](mailto:qiuling@jsinm.org) (L. Qiu)

**Table S1.** Crystallographic data for complex **1**.

| Complex <b>1</b>  |                                                                   |                                                |            |
|-------------------|-------------------------------------------------------------------|------------------------------------------------|------------|
| Empirical formula | C <sub>27</sub> H <sub>30</sub> N <sub>2</sub> Cl <sub>2</sub> Ru | <i>V</i> (Å <sup>3</sup> )                     | 2452.8(10) |
| Formula weight    | 554.50                                                            | <i>Z</i>                                       | 4          |
| Crystal system    | Monoclinic                                                        | <i>Dc</i> (g·cm <sup>-3</sup> )                | 1.502      |
| Space group       | <i>P2<sub>1</sub>/c</i>                                           | <i>μ</i> (mm <sup>-1</sup> )                   | 0.875      |
| <i>a</i> (Å)      | 12.180(3)                                                         | <i>F</i> (000)                                 | 1136       |
| <i>b</i> (Å)      | 16.920(4)                                                         | <i>R</i> <sub>int</sub>                        | 0.0857     |
| <i>c</i> (Å)      | 12.171(3)                                                         | Goodness-of-fit                                | 1.080      |
| <i>α</i> (°)      | 90.00                                                             | <i>R</i> <sub>1</sub> [I>2σ (I)]               | 0.0792     |
| <i>β</i> (°)      | 102.072(3)                                                        | <i>wR</i> <sub>2</sub> [I>2σ (I)]              | 0.2029     |
| <i>γ</i> (°)      | 90.00                                                             | <i>R</i> <sub>I</sub> (all data) <sup>a</sup>  | 0.1105     |
| <i>T</i> (K)      | 296                                                               | <i>wR</i> <sub>2</sub> (all data) <sup>b</sup> | 0.2462     |

<sup>a</sup> $R_1 = \sum ||F_o| - |F_c|| / \sum |F_o|$ . <sup>b</sup> $wR_2 = \sum w(|F_o|^2 - |F_c|^2) / \sum w(F_o)^2$ , where  $w = 1/[\sigma^2(F_o^2) + (aP)^2 + bP]$ .  $P = (F_o^2 + 2F_c^2)/3$ .

**Table S2** Selected bond lengths (Å) and angles (°) for **1**.

| Complex <b>1</b>  |            |                  |           |
|-------------------|------------|------------------|-----------|
| Ru(1)-Cl(1)       | 2.4270(18) | Ru(1)-C(1)       | 2.096     |
| Ru(1)-Cl(2)       | 2.4257(17) | N(2)-C(1)        | 1.361(7)  |
| N(1)-C(1)         | 1.351(7)   |                  |           |
| Cl(1)-Ru(1)-Cl(2) | 83.61(5)   | Cl(1)-Ru(1)-C(1) | 89.08(14) |
| Cl(2)-Ru(1)-C(1)  | 90.75(14)  | Ru(1)-C(1)-N(1)  | 128.6(4)  |
| Ru(1)-C(1)-N(2)   | 127.7(4)   | N(1)-C(1)-N(2)   | 103.6(4)  |

**Table S3** Hydrogen bond lengths (Å) and Angles (°) of **1**.

| D-H...A                       | d(D-H) | d(H...A) | d(D...A) | ∠DHA   |
|-------------------------------|--------|----------|----------|--------|
| C4-H4B ... Cl1                | 0.9700 | 2.5500   | 3.303(6) | 135.00 |
| C10-H10 ... Cl1               | 0.9300 | 2.7900   | 3.563(7) | 142.00 |
| C11-H11B ... Cl2              | 0.9700 | 2.5600   | 3.374(7) | 141.00 |
| C20-H20 ... Cl1 <sup>i</sup>  | 0.9300 | 2.5900   | 3.437(5) | 151.00 |
| C23-H23 ... Cl2 <sup>ii</sup> | 0.9300 | 2.5900   | 3.498(6) | 165.00 |
| C26-H26 ... Cl2               | 0.9600 | 2.8000   | 3.513(7) | 132.00 |

Symmetry codes: i: 2-x, -y, 1-z; ii: x, 1/2-y, 1/2+z.

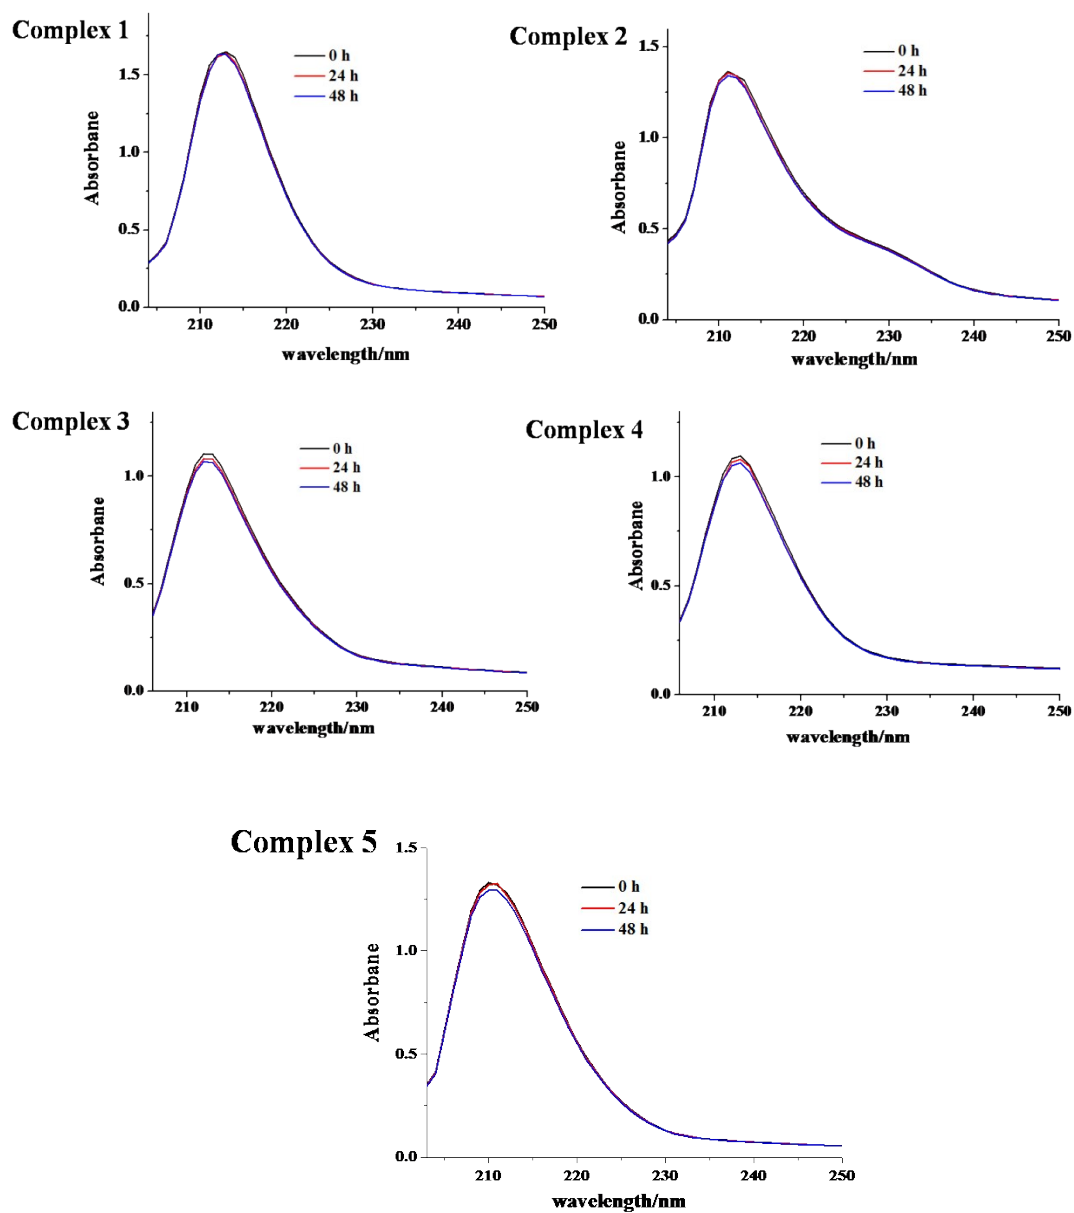

**Fig. S1** The stability of complexes 1-5 in PBS indicated by UV-Vis spectra.

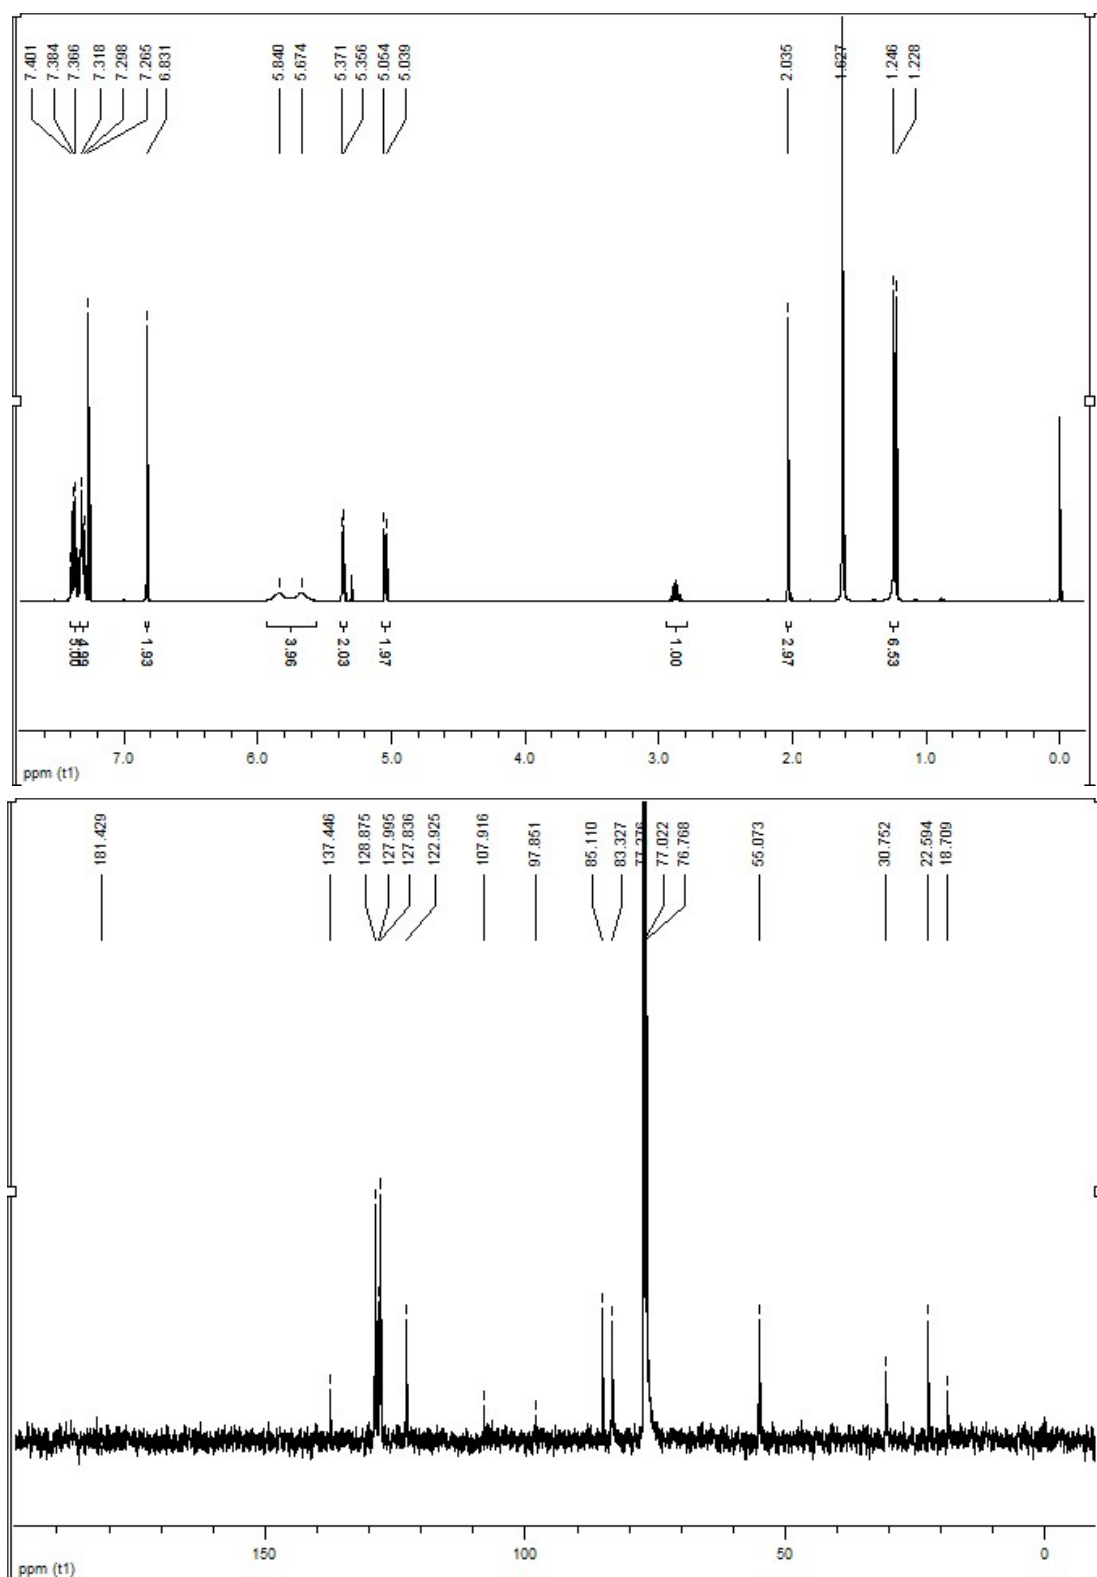

Fig.S2-1  $^1\text{H}$ /NMR (up) and  $^{13}\text{C}$ /NMR (down) of complex 1.

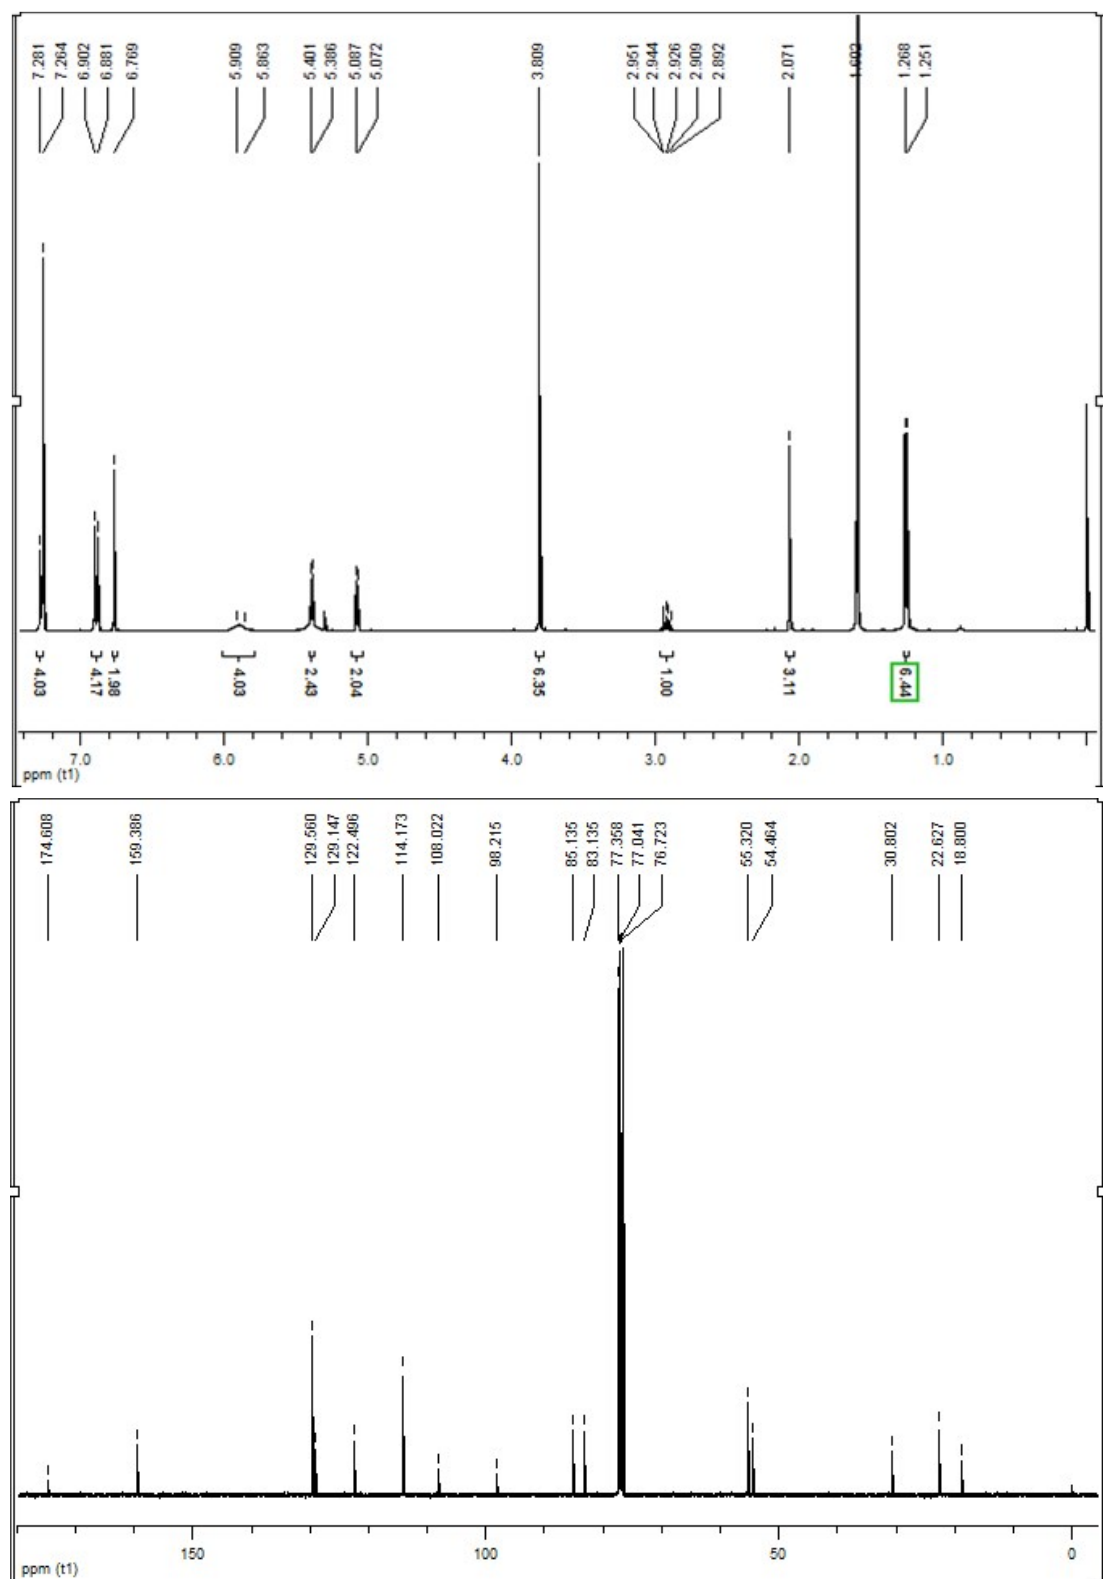

**Fig.S2-2**  $^1\text{H}$ /NMR (up) and  $^{13}\text{C}$ /NMR (down) of complex 2.

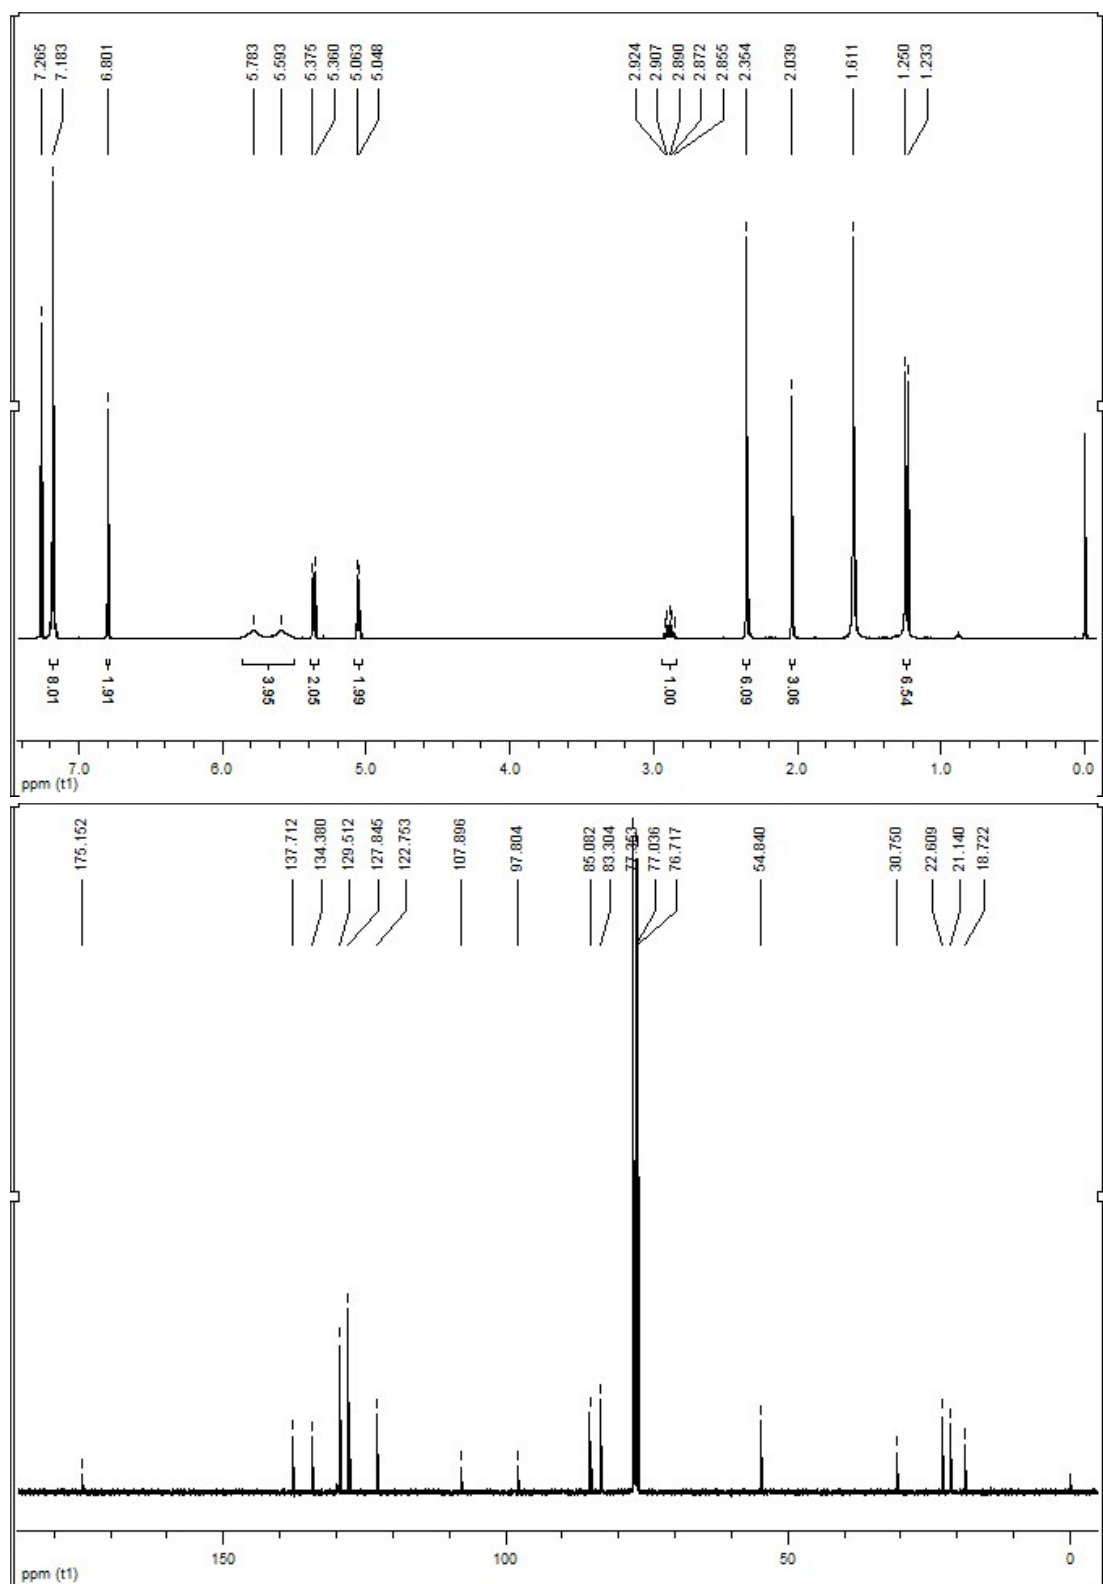

**Fig.S2-3**  $^1\text{H}$ /NMR (up) and  $^{13}\text{C}$ /NMR (down) of complex 3.

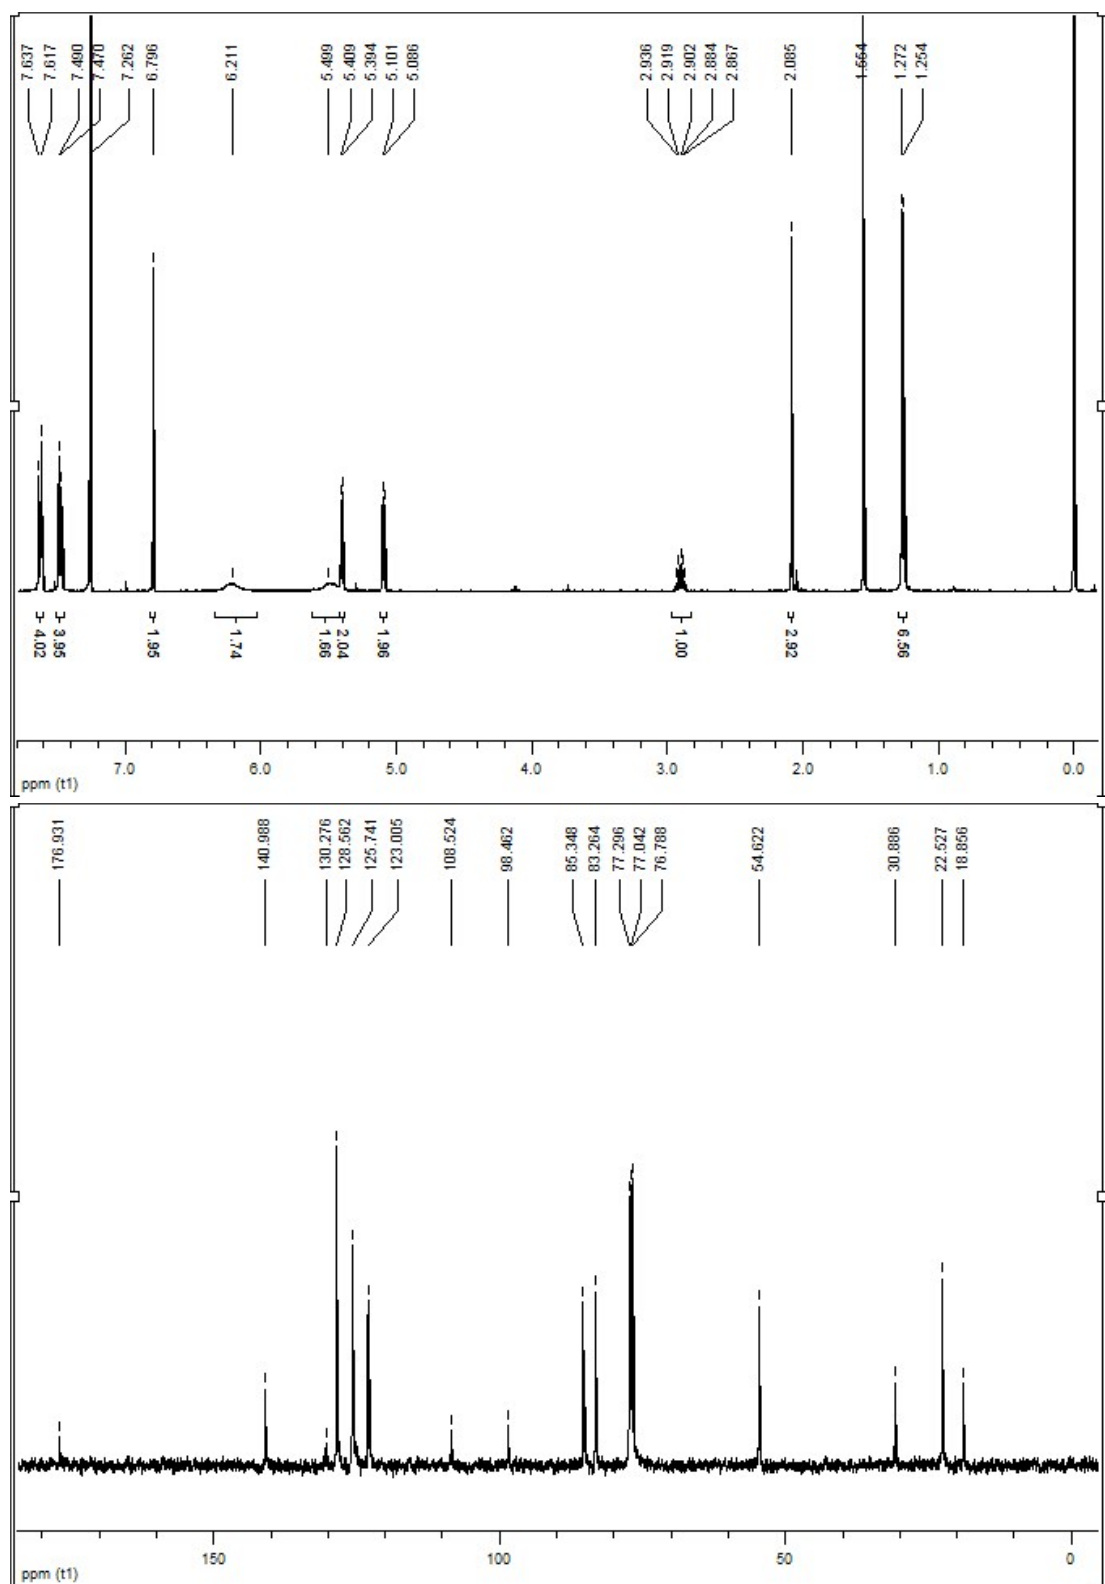

Fig.S2-4  $^1\text{H}$ /NMR (up) and  $^{13}\text{C}$ /NMR (down) of complex 4.

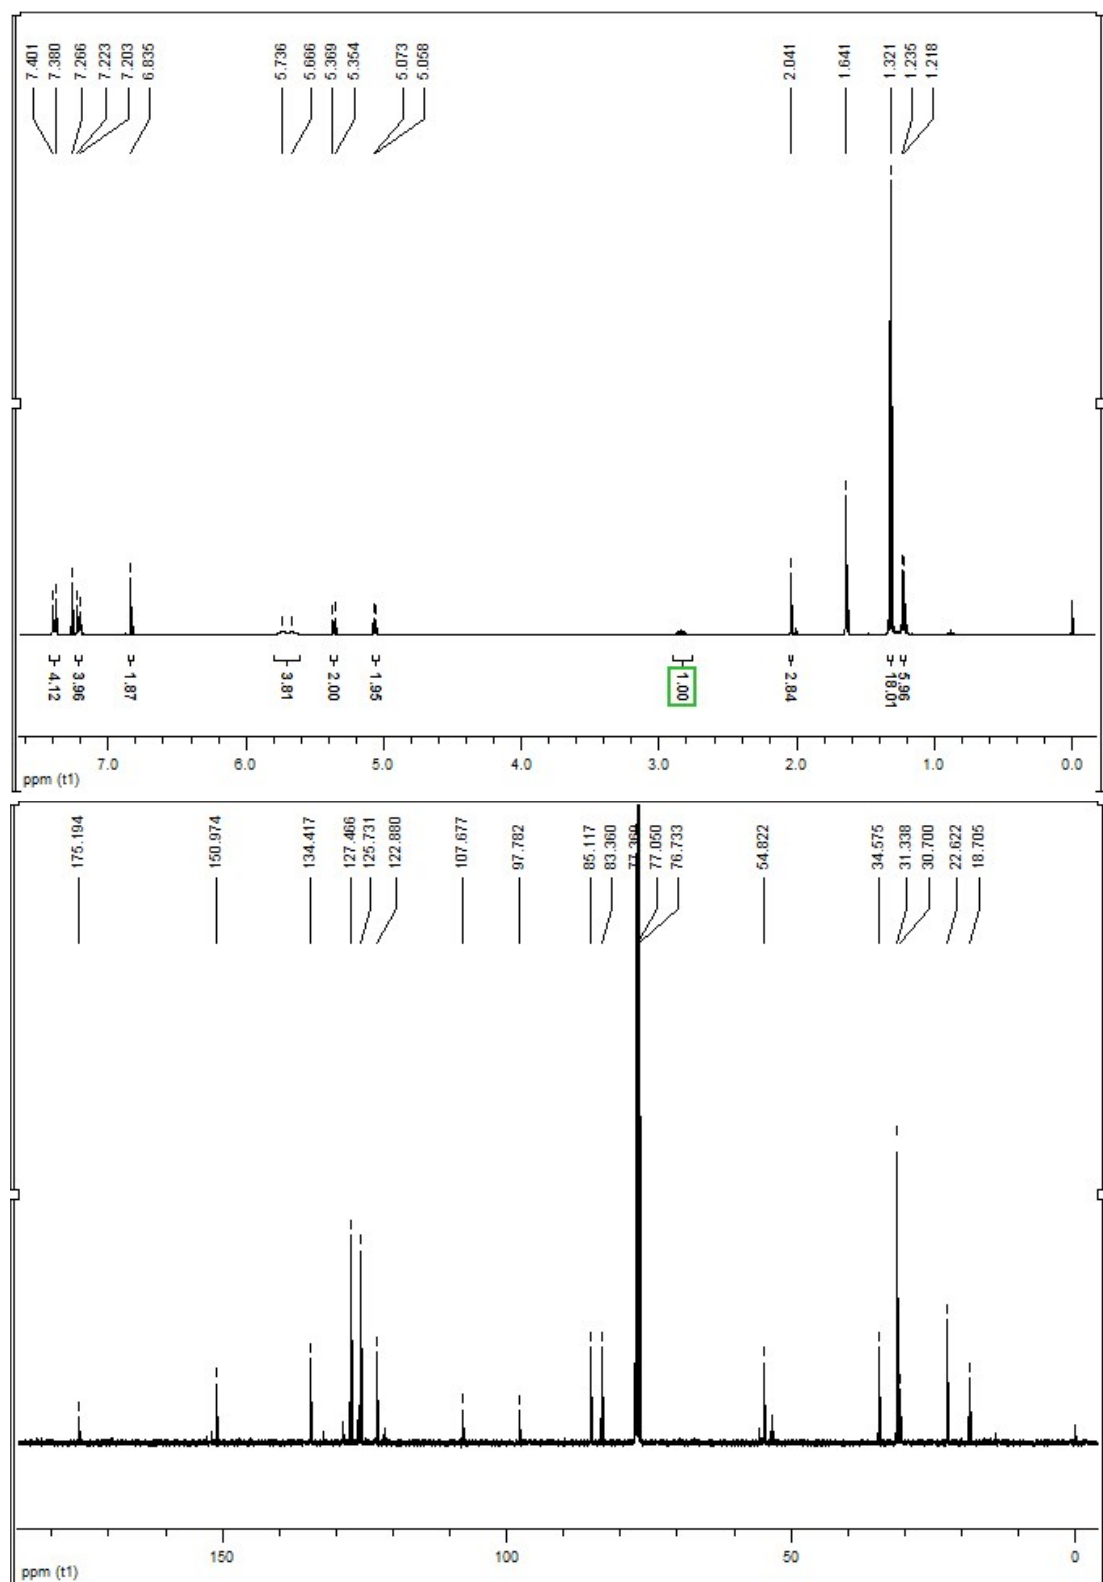

Fig.S2-5  $^1\text{H}$ /NMR (up) and  $^{13}\text{C}$ /NMR (down) complex 5.



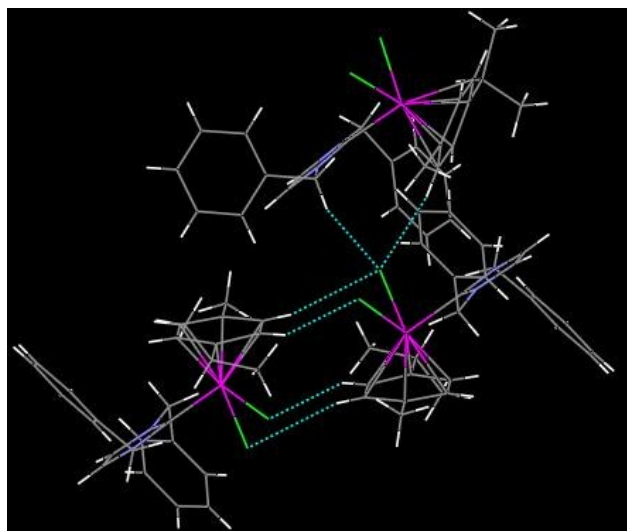

Fig. S3 The hydrogen bonds (dotted line) between adjacent molecules of complex 1.

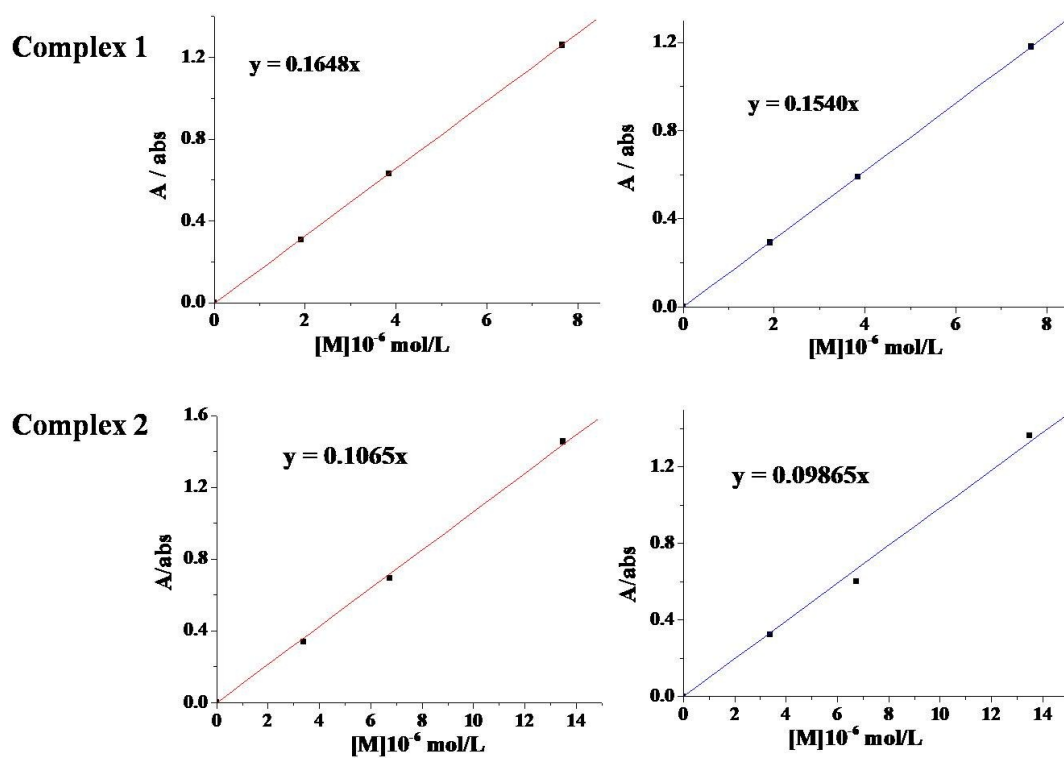

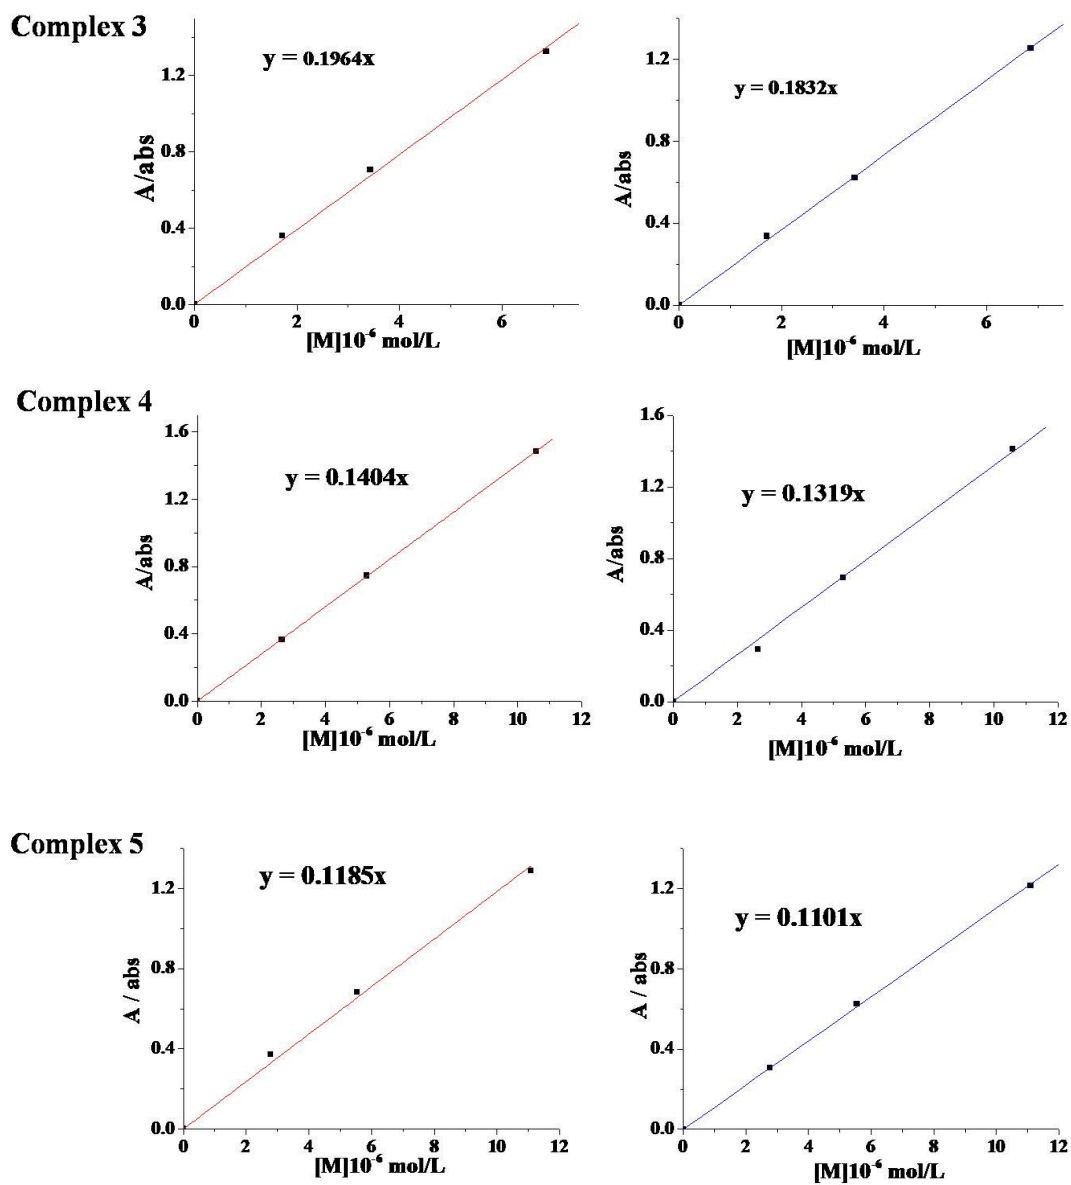

**Fig. S4** The standard curves of complexes 1-5 in water (left, red line) and octanol (right, blue line).

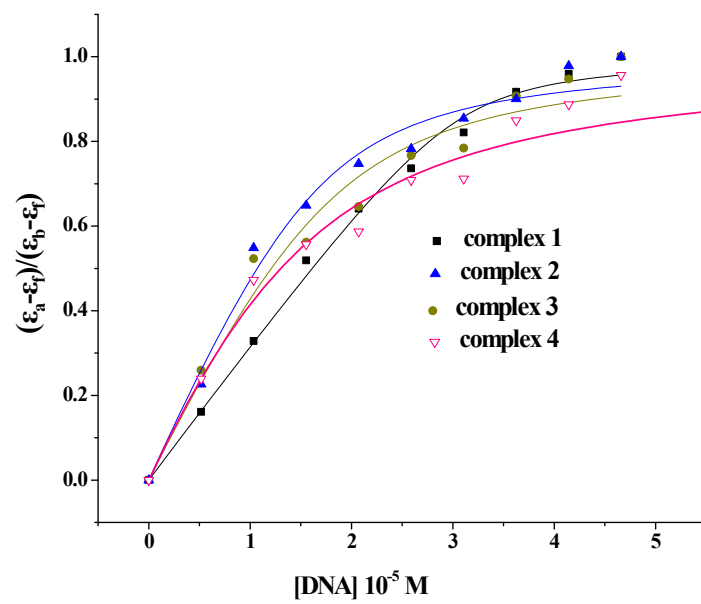

**Fig. S5** The least-squares fit of  $\Delta\epsilon_{af}/\Delta\epsilon_{bf}$  vs [DNA] for complexes 1-4.
